# Supplementary material
Source: PubMed Central journal article supplement (PMC5528684)

**$r=-0.45$**

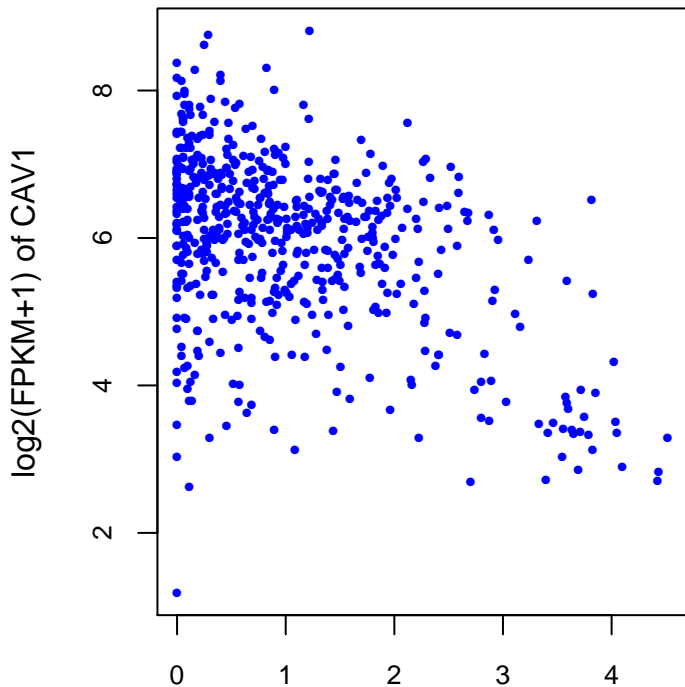

$\log_2(\text{FPKM}+1)$  of AC006159.3

**$r=-0.39$**

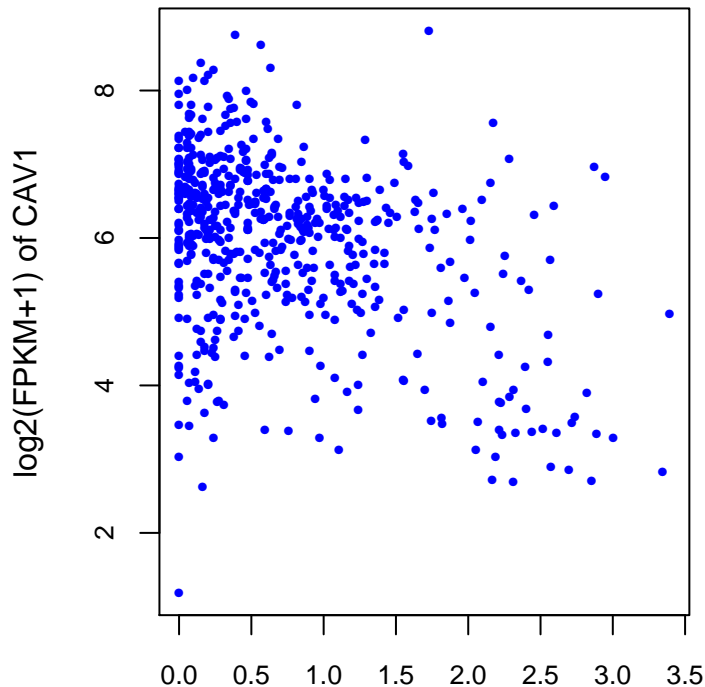

$\log_2(\text{FPKM}+1)$  of AC006159.4

# EZH2

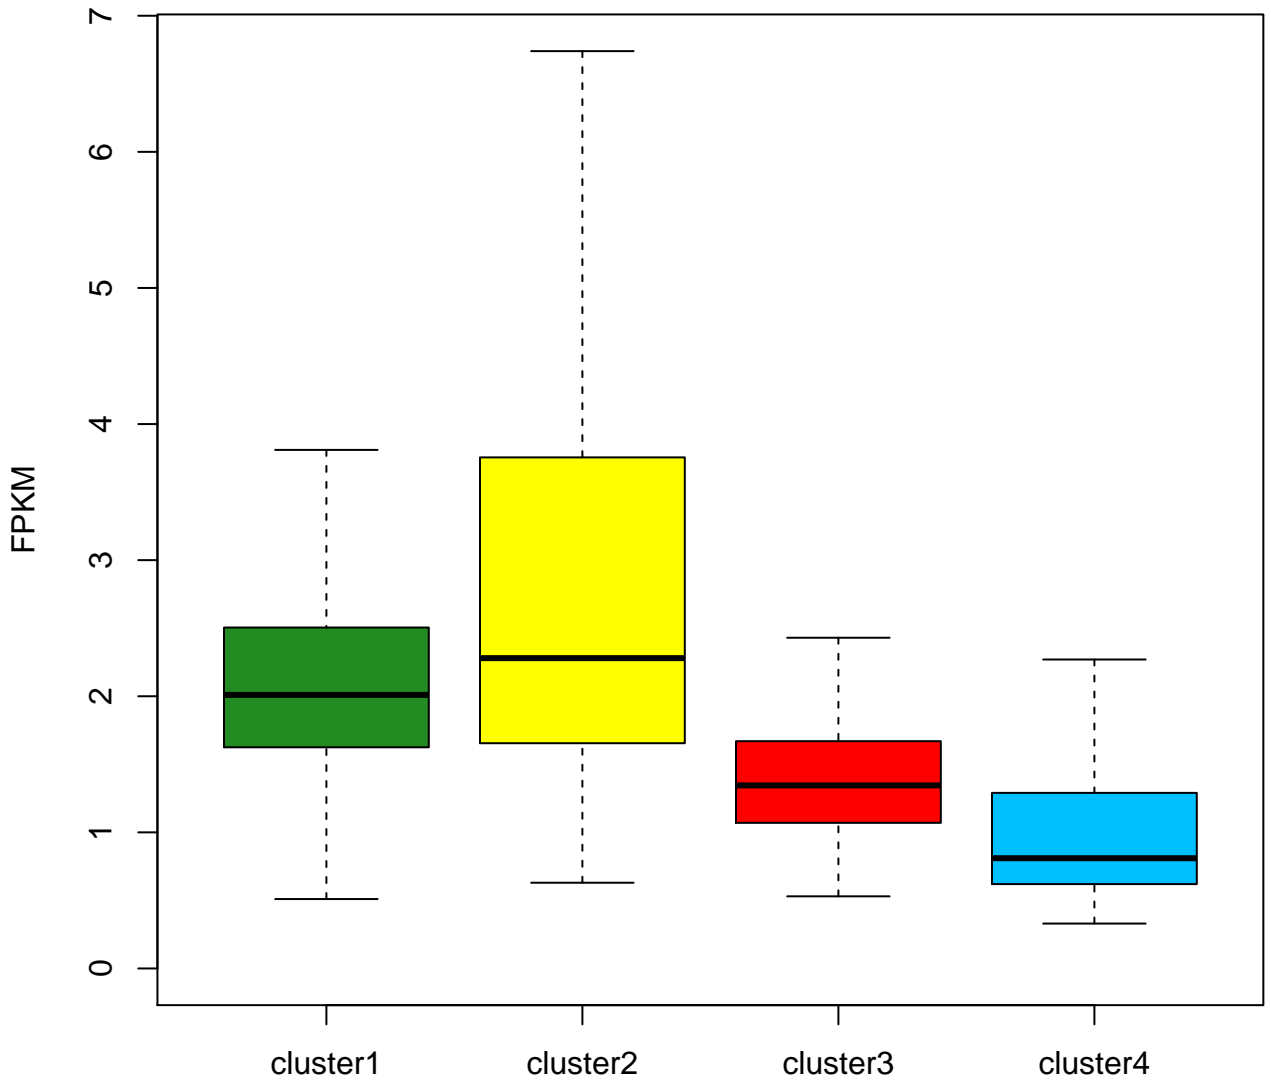

Supplement: MOL2-9-032-s002.pdf [file MOL2-9-032-s002.pdf]
